# Supplementary material
Source: Research Square preprint supplement (doi:10.21203/rs.3.rs-10243927/v1)
Supplement: Supplementary file 1 [file 89030a1510a57a37d6688d0c.docx]

**Appendix A: Measurement Items**

All items were measured using a five-point Likert scale ranging from 1 = Strongly Disagree to Strongly Agree. The questionnaire items were developed by the authors based on the study objectives and relevant literature on internal auditing, governance, financial reporting quality, and organizational decision-making. The instrument was further refined through expert validation involving academics, business professionals, and economists to ensure clarity, content validity, and contextual suitability for Somali private banks

| Construct | Code | Measurement Item |
| --- | --- | --- |
| Internal Audit Competency (IAC) | IAC1 | Internal auditors in this bank possess adequate professional knowledge and technical expertise. |
|  | IAC2 | Internal auditors receive sufficient professional training to perform their duties effectively. |
|  | IAC3 | Internal auditors demonstrate strong analytical and problem-solving skills. |
|  | IAC4 | Internal auditors are capable of identifying weaknesses in financial reporting and internal control systems. |
| Internal Audit Independence (IAI) | IAI1 | Internal auditors perform their duties independently without management interference. |
|  | IAI2 | Internal audit findings and reports are communicated objectively and fairly. |
|  | IAI3 | Internal auditors have sufficient authority and organizational support to perform their responsibilities independently. |
| Financial Reporting Quality (QFR) | QFR1 | Financial reports prepared by the bank are accurate and reliable. |
|  | QFR2 | Financial reports are prepared and presented in a timely manner. |
|  | QFR3 | Financial reports provide relevant information for managerial decision-making. |
| Decision-Making Effectiveness (DME) | DME1 | Management decisions in the bank are supported by reliable financial information. |
|  | DME2 | Financial information improves the quality of operational and strategic decisions. |
|  | DME3 | Decision-making processes in the bank are efficient and well-informed. |
|  | DME4 | Accurate financial reporting contributes to effective organizational planning and control. |
